# Supplementary material for: Inhibition of Wnt signaling pathway suppresses radiation-induced dermal fibrosis
Source: PubMed Central journal article supplement (PMC7423922; doi:10.1038/s41598-020-70243-3), 2020-08-12

# **Inhibition of Wnt Signaling Pathway Suppresses Radiation-Induced Dermal Fibrosis**

Dong Won Lee, MD, PhD, Won Jai Lee, MD, PhD, Jaeho Cho, MD, PhD,  
Chae-Ok Yun, PhD, Hyun Roh, PhD, Hsien Pin Chang, MD, Tai Suk Roh, MD, PhD,  
Ju Hee Lee, MD, PhD, Dae Hyun Lew, MD, PhD

**Supplementary Figure 1.** Clinical results in a mouse model. **(a)** Gross changes in the skin. Tiny dry desquamations and hair loss were observed, but there were no ulcerations. No significant differences were noted between groups. **(b)** Planimetric analysis of irradiated area showed a gradual increase with time, but there was no significant difference between groups. \*\*  $p < 0.01$  vs sLRP6E1E2(-). **(c)** Cutaneous blood flow by laser Doppler flowmetry. Values were taken from the center of the irradiated areas. The values of the sLRP6E1E2-treated group are higher than those of other groups at 8 and 16 weeks post-radiation, but there was no significant difference between groups.

a

PBS

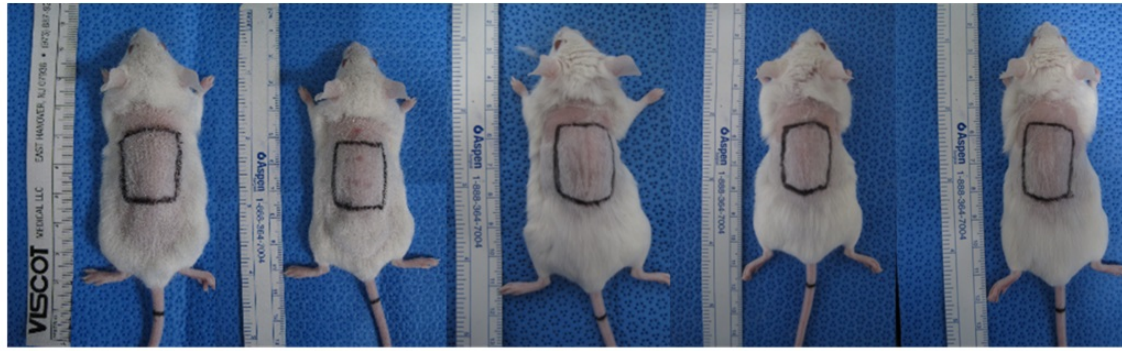

sLRP6E1E2 (-)

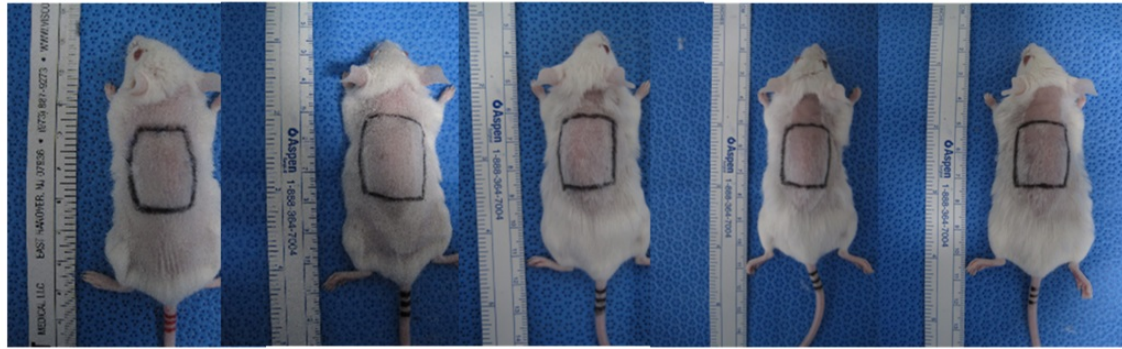

sLRP6E1E2 (+)

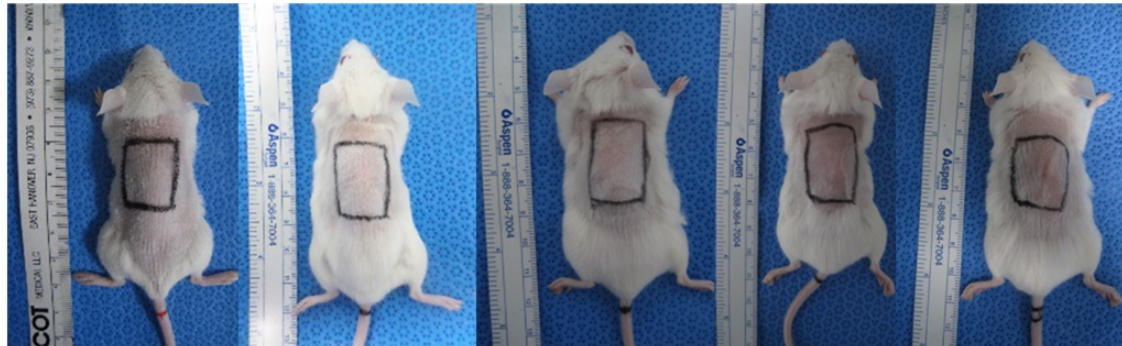

pre-radiation

4 weeks

8 weeks

12 weeks

16 weeks

b

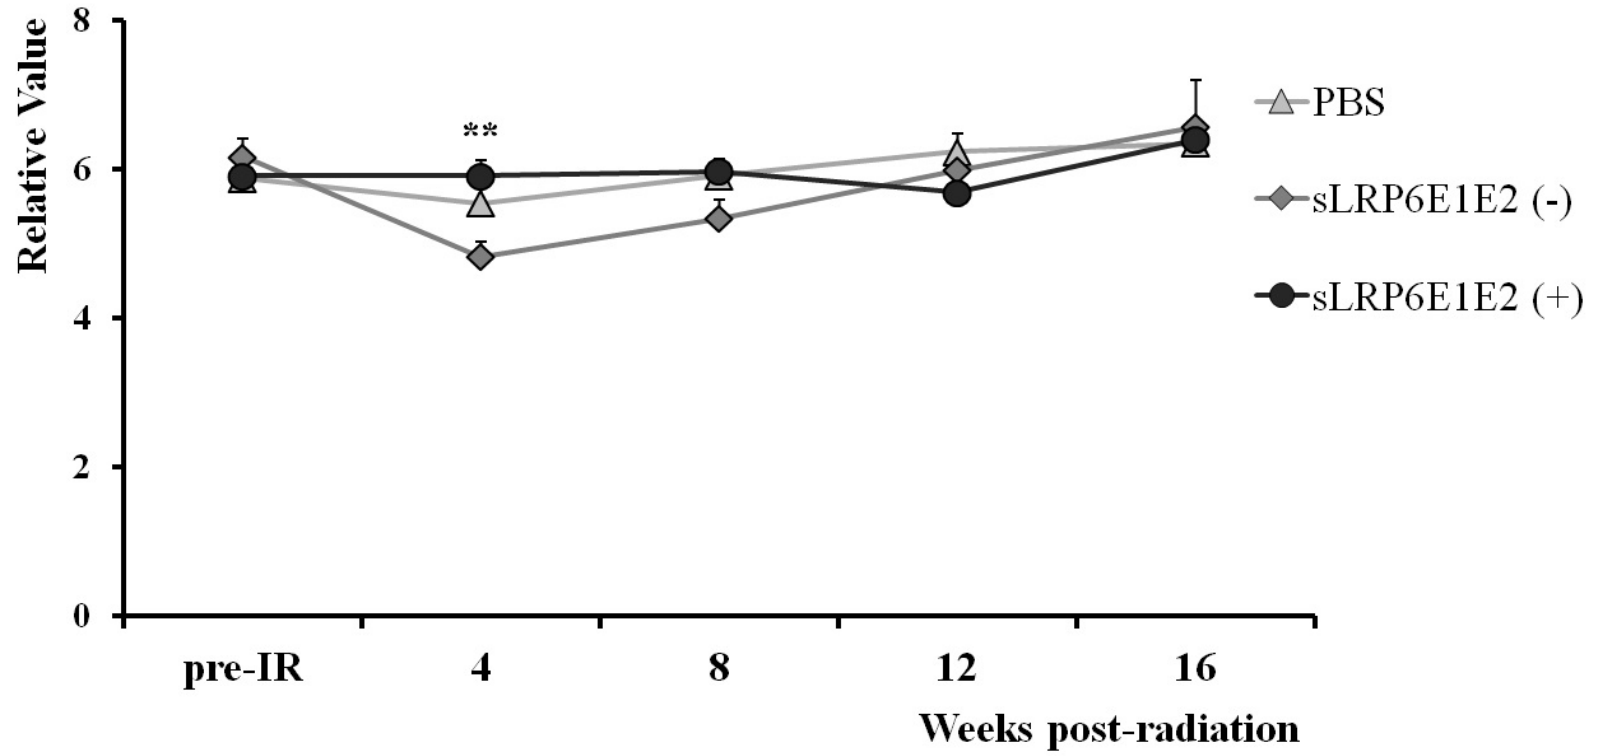

C

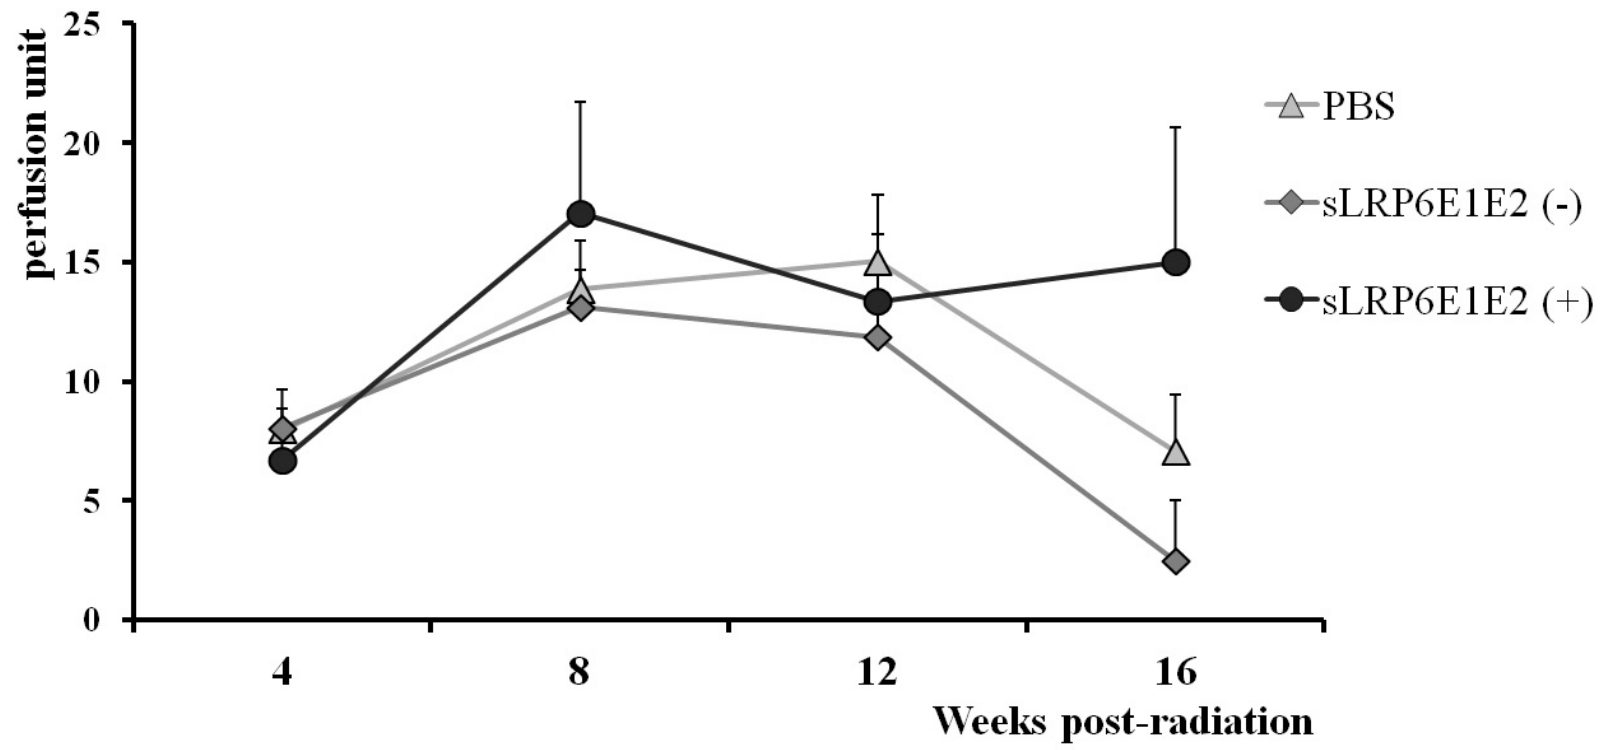

Supplement: 41598_2020_70243_MOESM1_ESM.pdf [file 41598_2020_70243_MOESM1_ESM.pdf]
